# Supplementary material for: De novo transcriptome assembly of the wild relative of tea tree (Camellia taliensis) and comparative analysis with tea transcriptome identified putative genes associated with tea quality and stress response
Source: PubMed Central journal article supplement (PMC4404113; doi:10.1186/s12864-015-1494-4), 2015-04-15
Supplement: 12864_2015_1494_MOESM2_ESM.pdf [file 12864_2015_1494_MOESM2_ESM.pdf]

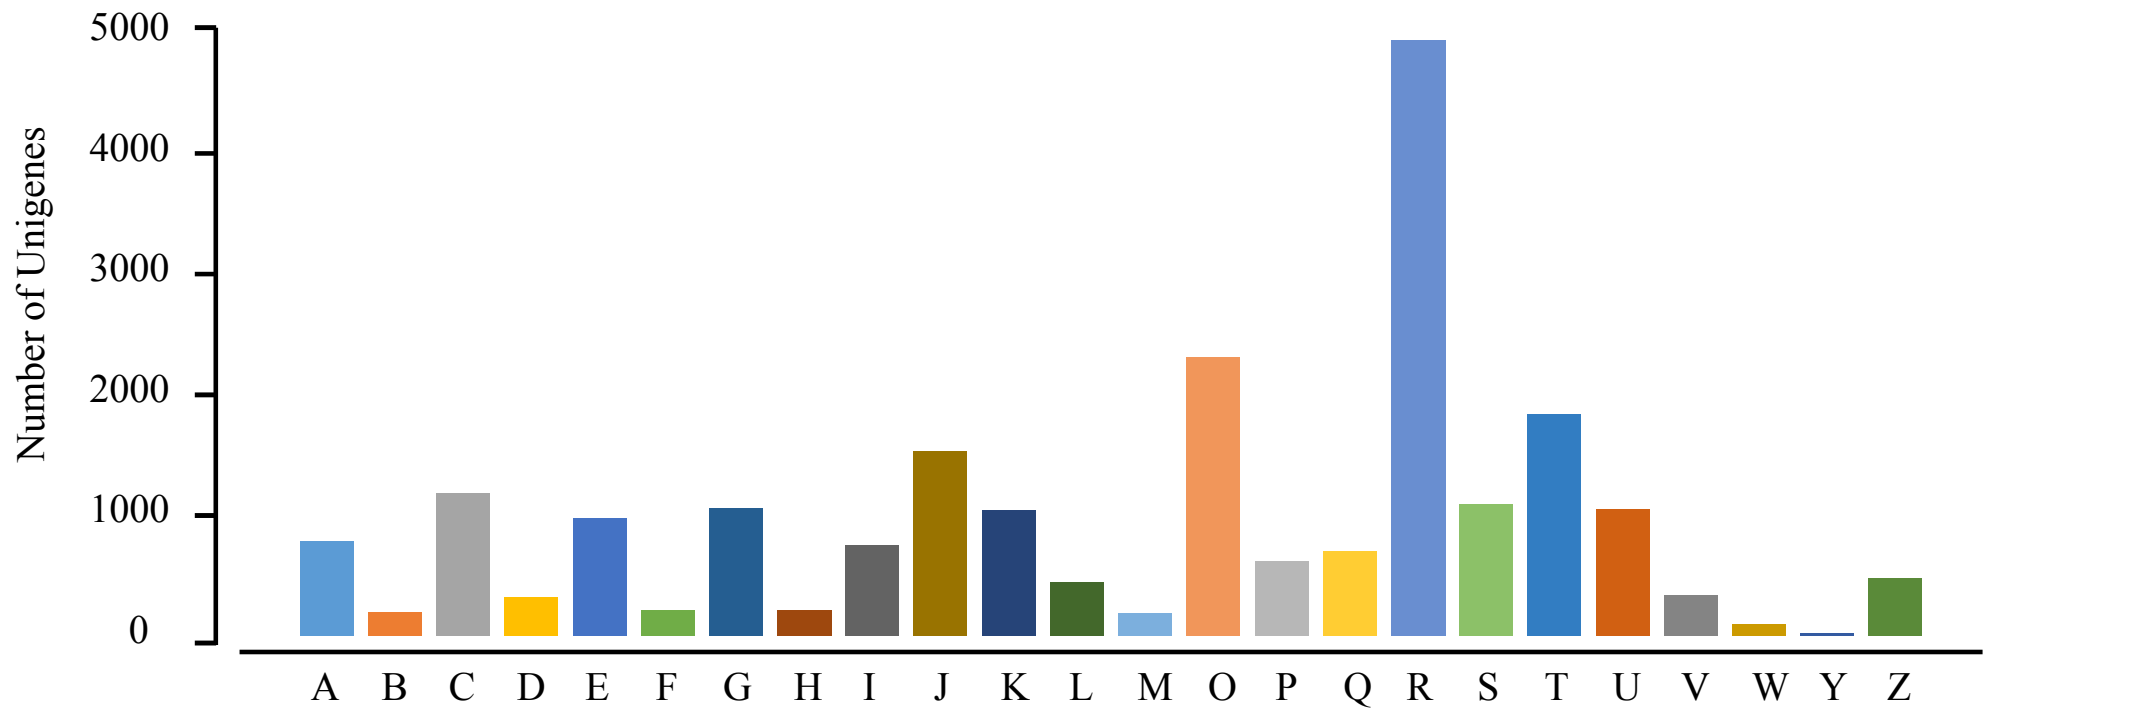

- RNA processing and modification
- Energy production and conversion
- Amino acid transport and metabolism
- Carbohydrate transport and metabolism
- Lipid transport and metabolism
- Transcription
- Cell wall/membrane/envelope biogenesis
- Inorganic ion transport and metabolism
- General function prediction only
- Signal transduction mechanisms
- Defense mechanisms
- Nuclear structure
- Chromatin structure and dynamics
- Cell cycle control, cell division, chromosome partitioning
- Nucleotide transport and metabolism
- Coenzyme transport and metabolism
- Translation, ribosomal structure and biogenesis
- Replication, recombination and repair
- Posttranslational modification, protein turnover, chaperones
- Secondary metabolites biosynthesis, transport and catabolism
- Function unknown
- Intracellular trafficking, secretion, and vesicular transport
- Extracellular structures
- Cytoskeleton
